# Supplementary material for: Tipping the Balance: Vitamin D Inadequacy in Children Impacts the Major Gut Bacterial Phyla
Source: MDPI journal article supplement (doi:10.3390/biomedicines10020278), 2022-01-26
Supplement: s1 [file s1]

**Supplementary Table S1. The Basic Characteristics of the Candidate Genes and SNPs selected**

| Genes         | Full Name                      | Location      | Selected SNPs |
|---------------|--------------------------------|---------------|---------------|
| GC            | Group-specific component       | 4q12-q13      | 14            |
| VDR           | Vitamin D receptor             | 12q13. 11     | 7             |
| DNCR7/NADSYN1 | 7-Dehydrocholesterol reductase | 11q13.4       | 3             |
| CYP2R1        | Vitamin D 25-Hydroxylase       | 11p15.2       | 7             |
| CYP27B1       | 1-Alpha -Hydroxylase           | 12q13.1–q13.3 | 3             |
| CYP24A1       | Vitamin D 24-Hydroxylase       | 20q13         | 3             |

| SNPs       | Gene          | Gene name                      |
|------------|---------------|--------------------------------|
| rs17219315 | CYP24A1       | Vitamin D 24-Hydroxylase       |
| rs2244719  | CYP24A1       | Vitamin D 24-Hydroxylase       |
| rs229624   | CYP24A1       | Vitamin D 24-Hydroxylase       |
| rs2296241  | CYP24A1       | Vitamin D 24-Hydroxylase       |
| rs2426496  | CYP24A1       | Vitamin D 24-Hydroxylase       |
| rs4809960  | CYP24A1       | Vitamin D 24-Hydroxylase       |
| rs6013897  | CYP24A1       | Vitamin D 24-Hydroxylase       |
| rs10877012 | CYP27B1       | 1-Alpha -Hydroxylase           |
| rs4646536  | CYP27B1       | 1-Alpha -Hydroxylase           |
| rs703842   | CYP27B1       | 1-Alpha -Hydroxylase           |
| rs10500804 | CYP2R1        | Vitamin D 25-Hydroxylase       |
| rs10741657 | CYP2R1        | Vitamin D 25-Hydroxylase       |
| rs10766197 | CYP2R1        | Vitamin D 25-Hydroxylase       |
| rs12794714 | CYP2R1        | Vitamin D 25-Hydroxylase       |
| rs1562902  | CYP2R1        | Vitamin D 25-Hydroxylase       |
| rs1993116  | CYP2R1        | Vitamin D 25-Hydroxylase       |
| rs7116978  | CYP2R1        | Vitamin D 25-Hydroxylase       |
| rs11234027 | DHCR7/NADSYN1 | 7-Dehydrocholesterol reductase |
| rs12785878 | DHCR7/NADSYN1 | 7-Dehydrocholesterol reductase |
| rs3829251  | DNCR7/NADSYN1 | 7-Dehydrocholesterol reductase |
| rs1155563  | GC            | Group-specific component       |
| rs12512631 | GC            | Group-specific component       |
| rs16846876 | GC            | Group-specific component       |
| rs17467825 | GC            | Group-specific component       |
| rs222020   | GC            | Group-specific component       |
| rs2282679  | GC            | Group-specific component       |
| rs2298849  | GC            | Group-specific component       |
| rs2298850  | GC            | Group-specific component       |
| rs2882679  | GC            | Group-specific component       |
| rs3755967  | GC            | Group-specific component       |
| rs4588     | GC            | Group-specific component       |
| rs7041     | GC            | Group-specific component       |
| rs10783219 | VDR           | Vitamin D receptor             |
| rs4516035  | VDR           | Vitamin D receptor             |
| rs7139166  | VDR           | Vitamin D receptor             |
| rs731236   | VDR           | Vitamin D receptor             |
| rs757343   | VDR           | Vitamin D receptor             |

**Supplementary Table S2. SNPs ID and related sequences.**

| Target Name | Sequence                                                                                                                                                                                                                 |
|-------------|--------------------------------------------------------------------------------------------------------------------------------------------------------------------------------------------------------------------------|
| rs2298849   | ATTCTTTAATGTTCAACAAGGGACATCTGCATTTATCCTGCTTTGTAAAATTAAGGTTTTCATTTAGTGCTGTCAGTTAACA<br>GCCTCACCTAATTCTGACAC[C/T]TATTATTACATAATAGTAATGTGTTTTGCCAGTGGAATAAAATGTGTGTTCCCAAGAAT<br>TATCAGTTATTAACGTAAACATGAATAACCTTACTCTTGACT |
| rs12512631  | TACTACTATTGTTAATTGCAAACCTAGAAATTTCCAGAATGCTTTAGCTATGAACTAGTAGCCTTGTTGGTGGTGGTTGTC<br>ATGGAAGAAACAATTAGATG[C/T]TTTCTTGGCCTAATAGAGAGAAAAGAATATTTACAGTCTGGAAGGAAATGGACA<br>AGGATAAAATAGCCTCTGGGAAAGAGAATCTTTTGACCTGATTATC   |
| rs16846876  | TTTTCGTTTGTGGATTTTGTGATTTTCGCAACTTAATGCCTTGTCAGTTTTAGAATTGTAAATATATTATCCCTACCTG<br>CACATGTCTGTGAACCTT[A/T]TTCATGATGCTTTTGTGGAACAGAACTCCTAACTTGATAATAAAATMATCAATATT<br>TTGCCTATGATTTGCTCTTTGAATTTTCTTAGGTAGG              |
| rs17467825  | AAATGGAACAAATGACATCATTATGCATATTAGATCTAACATTAAACTCTTTTACTAAAATTACAATATTTCTGTCAGCG<br>ATTCTTAATATAAGAAAAA[A/G]TGGTGAAATGTGTTTAGAGTGTGCTGGAAAATATATCCATGGGAACATGAAAACC<br>CTACTTCAGTGAATTGTATATTATTGACTACTTTGTGACAATA       |
| rs3755967   | TGATGAAGGCCTACCAATGTTCAATTATTTACAGGAATAGTTACATGGCTTTGAAAAAGCAAATTATACCTTGTTACAAA<br>GTTATAGGTCTGAGGTACTT[A/G]ATATCCAGAAATATGAGACCACAACCTTACCCTTATCTTAGGTTTCCAGAACAC<br>AACCAACTCATTGCAGTTCCTGGGTTCCAGGGAGAATTTGTAG       |
| rs2298850   | AAAAGACCCATTTGCCTACAGAAAAACCTATAGTTACAAAATTAGACTTGAAATCTTCTTTCTTTCTTTCTACCATCATTCA<br>GGCAGGGCATCCCTTTGGG[C/G]TCTCTGAGAACTCATTACTATGCTTCTTTAAATGTTTCAACAGACTGCTAGTGA<br>GCATCAGATATGATTTCCCAAAGTATTCCAAAAGTCATTGTAA      |
| rs731236    | GGTGGGATTGAGCAGTGAGGKGCCAGCTGAGAGCTCTGTGCCTTCTCTCTATCCCCGTGCCACAGATCGTCTGG<br>GRTGCAGGACGCCGCGCTGAT[C/T]GWGGCCATCCAGGACCGCTGTCCAACACACTGCAGACGTACATCCGCTGCCG<br>CCACCCGCCCGGGCAGCCACCTGCTCTATGCCAAGATGATCCAGA            |
| rs10783219  | TGCCTACCTTGCCTTCTGGCTGCTTACCTGCTTTACAGCCAGACTTTCTGTGGGATAGTGTGGTCCCAGAGGTCTGG<br>GAAGCTGGATGAGCAAAATG[A/T]GGAGGCTGTAGATATGGAGGAAGAGGGAAGAGGAAACGTGAGGCCAGCTCT<br>GGCTCCACTATGAACCCCAATTTCCCAAGGGGAAGCTGAAGAGGAGTT        |
| rs7139166   | AGAAACAGATGAAGTGCCCTTTAGAGGTCTGCGAGTCTGATGGATGGATTCTCTACCTGTAATGAAAGTAATAGGA<br>AGGATCCCTTGCCTCAAGCAT[C/G]GTGGGAAAGCTAGCGGTGATTCTGTGGGAAGAAAAGCATAAGAGGAAATTT<br>CCAACCAACATACCTTGGGACATTCTCTGCAAGTCCCATGAGCCTCT         |
| rs4516035   | GGAGAATGTATAAATAAATAGTAATTACAACATAATCTTCTGGAATAGAAATGCTCACAAAATCATCCAGCAGTCGATG<br>ACCTCCTTTAGCCAGGGAAGA[C/T]ATTGCTATTGCGCTTTACAGAGGAGGAAACCATGGCTCAGAGGGACAAGGTG<br>AAAGGGTGGGAAATTGAGGCATAGAAAGTTAAGTGATATGCCAAC       |
| rs757343    | AGGTTTCTTGCGGGCAGGGTACAAAACCTTTGGAGCCTGAGAGATGGTTCTGCCTATATAGTTTACCTGATTGATTTGG<br>AGGCAATGTGCAGTGACCCTT[A/G]ACCTCTTCCGCTGGTTAGAGGTGAGAAGAGGGAGAAAAGGCCGAAGAGGAAG<br>TTATTGTGACCTTGGGGACATGATGTCGGTGATGAGGTCCAAAGAGGG    |
| rs703842    | AAGAATACAAGATCCCGTCTCCAGGCAGTGACCTCCCAAACAGCCTGCCTGGTCACTGACTGCTTACTCTACCTTAGC<br>TGGACCTCGTCTCCAGGGA[C/T]TAGAGAAAAGAGCAGGAGTCTGGGTCTTCCAGTTGAGACTGCTGGAGCTGAG<br>ACACAGTACTCTTAAAGAAGGTGGGGAGCTGCCAGGGCAGAAC            |
| rs4646536   | CAGGGAGATAGCAGAGAAAAATGGCCCTCTACTCTGGCCAAAAAGGGTTTGAAGTTGGAACAATGAGAAGGGGG<br>CTGCAGCCCTAGCCTCATCTTG[C/T]TGTCTCCATTTGTGCTTTGCAACCTAGACTGTACYCTGTGGTACCTGGAAATT<br>CTSRGTCCAGACAAAGACATTCATGTGGGTGACTATATTATCCC           |
| rs10877012  | AGCCCGGGAGGTCAAGGCTGAGTGAGTTATGATTGTACCACTGCACTCCAGCCTAGGCAACAGAGAGAGGGCCTGTC<br>TCTAAAAAAATTAATAAAAA[G/T]AATCTCCACAGTTTACCTCTGCTCCTTACTCCCTATTCCCACTGCAACTCT<br>ATCAGGCTCTGTGCCAGTCAGCTAGCTCTGAAGTTCTGGAATTG            |

|            |                                                                                                                                                                                                                       |
|------------|-----------------------------------------------------------------------------------------------------------------------------------------------------------------------------------------------------------------------|
| rs1562902  | CTACAAGTGTGCATAACATAGGAAATGTGATCAGTCTTGGAGGTCAGTAATTGTAGTCTGCACCAAACAACCAGCTTAT<br>ATCCAGGGACTCCCCATGAT[C/T]GTGTTCATGGAAGATGTTACTACAATTCTCCCTATCAACTGGTCTCATATGGAC<br>ACTGAGTGAAGGGAAAGGAAAGTAACAAAATCCTCTRTTTAAAT    |
| rs10500804 | CATGGCACTTATTTAACTATCTTGAACCAGAAACATTCATATTCTTGTCTTCTGCCTGCATGCTAAATTACAACTCCTT<br>AGGAGCAGTGATTTTCATC[G/T]TTTTTCATCTTTGAATCCTTACACAGAATCTCATTGCTGTGCATAAAGTTCTCAAT<br>AAATGCTGTAAAAATAAATAACGCTGTCAATTCTACTT         |
| rs10741657 | AGAGCAATGACATGGAAATACAATAATTTTCAATAATCAGAAGCAAAACAAAAAGTGCCTTATAGAAAACGCCTGGTGG<br>TTGGGGAGATACTTTAGCAGGC[A/G]AGGGCTGTCAAGGAAAGTCTTATTAGGAAGATGACATTGGAGCTGAGATCAA<br>CTGCTAAAGAAGTGATTTGTTTCTACTACTGTTGTAATAAATTACC  |
| rs10766197 | AATAGCAGTCCCTTTAATAGAAGGCTTTTGGCTGTCTCCTTCAAAAACCATAATCTCTGTACAATTTGGAACACTCCAGTT<br>AATTAGAGATCTTTAACT[A/G]TGCCAAGATACAGAAAGGACCAAGCTTTAAAAAATATTGCTTCCACATGGATTGG<br>TCTAAAAGCAGTATTTAACCTAAGCTYTGAATACAGTTTAC      |
| rs12794714 | AGCCCGGGCCAGCCTGGCGGCCCTCCCTGCCCGGGGCCCGTGGGGCTGTACCTCTCCGTACACCTGGCTCTGCTTTCT<br>CATGTAGACATGGGGAAGCTC[A/G]GATGAGGCTGCCAGGGAATAGATGTTGCCGATAAATGGCAGCCCCGGCGGCC<br>CCGGGGGGAAGCCCATCGCCGCCTCTGCTTCAGCAGCTGGCGGACCC   |
| rs7116978  | TTAAATTTATTTTCATAGTTGTATAGTCTTATTCACTTTAATTTTTAAATAAAATTCATTTAAGTGCTTAAGTCACCTTTTAT<br>AGGTAAAAGATTATCTAA[C/T]ACAATACTTTGAATGTGTATTCTTAAAGACTTCTATTTTGAAGTCTCTCAAAAAAATG<br>CCATATGAATGGGGCTCTAGACTTCTATTAAGTTTCAATC  |
| rs1993116  | TTATTGAGAAGTTTATGCACAGCACTGAATGAGATTCTGTGTAAGGATTCAAAGATGAAAAMGATGAAATCACTGCTCC<br>TAAGGAGTTTGTATTTAGCA[C/T]GCAGGCAGAAGACAAGAATATGAATGTTTCTGGTTCAAGATAGTTAAATAAG<br>TGCCATGGGAGCTTCTAAGCTCCCATGTGTGGTTCAAAGCAGAGAG    |
| rs3829251  | TGTGCTCACCAGGGTGTGCAGCAGGTCCTGGGAGTTGGCTGCAGGCTGGCTCCTACCCCTCCTCTTCTCTTCCCTGC<br>CCTACTGCCTCTTCCACGG[A/G]CAGTTCTCTATGTGAGGACAGTGGAAGGAGGGCACCTTTCCRGAGAAGRAAGACT<br>GGGTTCTATCTAGAATATTCCATCCATAATGGCTCCTAGGAGAAA     |
| rs12785878 | TGTTCTTTAATTTGTCTTCAATTTGATTGATTCTTTAAGAAATTCTTACCTAAGTGCCAAGGGATCTAGGGTTCTGGGCTG<br>TCTGATATCACAAAGCTTC[G/T]ATCCTCTCTGGCCCCGTGGCCGGATCTTCTCTGGGCTGGACTCAAGGCCTGATCG<br>TCTCGTGAGCCTGACCTCTCTGGGCTGGTCCGGGGGCTGAT     |
| rs11234027 | CTGGTGACATGTTGCTGTATTCTTGGGTGAGAATGCTRAGGACATGCTGCTGTATTCTTGGGCGAGTACATTGGTGACA<br>TGCTGCTGTGTTCTTAGGTGA[A/G]TACACTGGTGAAACAATGCCAATCKCACGGCCAAGAGWTTTGAGGAGCAGGG<br>ACATCTGGTAAGCAGACTTCAGTTTCTTTTCAGTAATGTGCCCCCTCT |
| rs2244719  | AAGCCATTCAACAGAGGAAGAGAAGGGAAGGGAATAATTATGTTCTAAACACCCATTACACGCCAGGTACTGGGCTAG<br>CACTTCATATAGGGTTTTTTT[C/T]CTTCCATTTTCATATTTATTTAGAAGGAACCTTTTACAAATAAAATCTCAACTC<br>TTCATTTCAAAACTTTTTACCTAGAGAAAAGTTGAAGGAATGG     |
| rs2296241  | ACGACAATTACTTTCAAACGACCATTTGTTCAAGTTCGCTGTACAAGTCTTCAACGTGGCCTCTTTCATCACAGAGCTCAT<br>CTATTCTGCCATAAAATC[A/G]GCCAAGACCTTCAAAGAAAAACAACCGCAAAAGACACATTTTAAAGCCGTTGAAGGA<br>AAACAAAACTTTAAAGCTCACTGAGCTAAGTTCAAGTCTTGCTA |
| rs2426496  | GCTTGGGCTGAAACCATGGCTCCACCACTCATTAGCTGTGTGATCTTGGGCAAGTTATTTAACTTCTCTGAGTCTAGTTT<br>CCTTAATGGTAAAATTGGAG[G/T]TACTATACCTGTGTCTCAGGAAGGTCAAGATAAATACTAAAAATATTAGACAAA<br>ACACGATTGTCTTCACTAAAATCTGTTTGGCCTCTGACTTGCTT   |
| rs4809960  | GGCATAACTTAAGCACCTAAAAGAAGCATTAAAGGGCTGCTCTGGCCTTTCCCTAGGCAGCAATAATGCCTGTTTACA<br>AAAGAGTTGTCAAAAGAGCCA[C/T]GTTTTATCCGCAAAATCACCTGCAAAATCAGTGAGCAAGTCTGTGACGACAACT<br>TACTTCAAACGACCATTTGTTCAAGTTCGCTGTACAAGTCTTCAAC  |
| rs4588     | AAATTTGTATAAAATAAATACATGTAGTAAGACCTTACATTTAAATGGTTTTTTCAGACTGGCAGAGCGACTAAAAGCAA<br>AATTGCCTGAKGCCACACCCA[A/C]GGAAGTGGCAAAGCTGGTTAACAAGCACTCAGACTTTGCCTCAACTGCTGTTCC<br>ATAAACTCACCTCCTTTACTGTGATTGAGGTTAGGAAAATGT    |

|            |                                                                                                                                                                                                                  |
|------------|------------------------------------------------------------------------------------------------------------------------------------------------------------------------------------------------------------------|
| rs17219315 | TTAGCATCAGAATATTTGGGATAAAATAGTGATCATCTTTGACAATAGTTTGACAATAGGATGAAAAAGCACCTTTCCTCCTAGTCAAAGATTGCACCA[A/G]AAAGTTGAAGTCCAGATAATTTGGGTTGAGGGATTTGAGGTGTCCTTGCAGGGA GTGGGGCTGGGAGGCCTGGGGACAATTCCTAGCGGTAAAAGGGGG     |
| rs6013897  | CTCTGCCACTTACCTACTGTGTATCTTTGGGTAGGTTACTTCTGCCTCTGTCTTGGTTTCCTCATCTGTAAAAGGGGGATA ATGAAAGTACCTACTTCAG[A/T]GGATGATTACACTTCCTTCACATGCATTACGAGTTTTCTGAACATATAATCCTGTTG AGATCCATGTGGACTTGATGATTCTAATTATTTGTCATGCAT   |
| rs7041     | TTTTGCATTAGAAATTTGTATAAAATAAATACATGTAGTAAGACCTTACATTTAAATGGTTTTTCAGACTGGCAGAGCGA CTAAAAGCAAAATTGCCTGA[G/T]GCCACACCCAMGGAAGCTGGCAAAGCTGGTTAACAAGCACTCAGACTTTGCCTCC AACTGCTGTTCCATAAACTCACCTCCTCTTACTGTGATTGAGAGG  |
| rs229624   | CATGCCTCCTCTTCATGTCTGTGATGTACCAGGCCACACAGGTCATGGTGTCAATGGCATCCTCCACCACCTCAAACCA TCCTCTTCTTCATCAAATG[C/T]TTGGCAATTTCTGCGCAGAAGATAGACGCTTAGGTGCCCTGACCCGAAGGCCCT GCCCTCCCCAGGCCCTAGGTGCTTGGGAGGACCGAGGGGCTACC      |
| rs222020   | GAATAACAAGGGGAGAGAGATCACAGAAGAACACAGTAAGAGAAAAACGGCAGCTTTACACATCTTGGTAACCAGAGGA GACAACCTTGGCTCACCATGCTG[C/T]CCATTGAATTTTTGNCCATTGAGTTGAGTTTTCTGCTGCTATCTCTTACT AGCTTCTCCTTCTGTGTTAGCCCTGGAGGAGGTAGAAGCAGCC       |
| rs2882679  | TGATTTAGGACCATACCACGGAGAGACACAAAGTGGTACCAGAGACCAGCTCATTAAGTTTACCATATACAACATATGGT AATTTGTTTTTAAAAGATATT[C/T]TAAAACAGGTAAGTCAAAGTTTCACATATGGAAATATGTCCAAATTAAATGTGC TTGTCTTCTGAAGAGTCTGGGTCATTCATTAACAAAAAAAAAAAAA |
| rs1155563  | GAACTGATAATATCAAAATAACAAATTTACTTTCTGTAGTAAAATTTGAAGACTGAAATGGTTATTCTAAGACTGTGCT CTTGCTATTGTANTTTTTAA[C/T]AGATAAAAAAATCACAGTTATTTCCATATAAAAAATATTTCACTCATAAATGGGAGT CGAACAGTGAGAACACATRGACACAGGGAGGGGAACATCACAC   |
| rs2282679  | TTCTGACCTTGTGATCCACCCACCTCGGCCTCCCAAAGTCTGGGATTACAGGCGTGAGCCACCATGCCAGCAAATCT CTGTCTCTTAATTATCTCACA[A/C]AGCCAGGTATTTTTATTGTTAGCTTTGGAAGCAAGTAGTAGTCCCTCTGGGTTGC CAAAAACATAAATGAATTGGCTCACAGTGTAGAATCAGATTGGG     |

**Supplementary Table S3.** Allele frequencies of the SNPs assessed in this study. HWE: Hardy-Weinberg equilibrium; NA: not available. All alleles in the table below are reported in the Forward orientation.

| SNP ID            | Gene          | Chr. | Allele  | Current study cohort (N=94) | HWE P-value  |
|-------------------|---------------|------|---------|-----------------------------|--------------|
| rs10783219        | VDR           | 12   | Ref (T) | 0.31                        | 0.9          |
|                   |               |      | Alt (A) | 0.69                        |              |
| rs7139166         | VDR           | 12   | Ref (C) | 0.66                        | 0.24         |
|                   |               |      | Alt (G) | 0.34                        |              |
| rs731236          | VDR           | 12   | Ref (A) | 0.51                        | 0.31         |
|                   |               |      | Alt (G) | 0.49                        |              |
| rs4516035         | VDR           | 12   | Ref (T) | 0.66                        | 0.24         |
|                   |               |      | Alt (C) | 0.34                        |              |
| rs10741657        | CYP2R1        | 11   | Ref (A) | 0.28                        | 0.82         |
|                   |               |      | Alt (G) | 0.72                        |              |
| rs10766197        | CYP2R1        | 11   | Ref (G) | 0.6                         | 0.08         |
|                   |               |      | Alt (A) | 0.4                         |              |
| rs12794714        | CYP2R1        | 11   | Ref (G) | 0.61                        | 0.06         |
|                   |               |      | Alt (A) | 0.39                        |              |
| rs1562902         | CYP2R1        | 11   | Ref (C) | 0.41                        | 0.65         |
|                   |               |      | Alt (T) | 0.59                        |              |
| rs10500804        | CYP2R1        | 11   | Ref (T) | 0.61                        | 0.07         |
|                   |               |      | Alt (G) | 0.39                        |              |
| rs1993116         | CYP2R1        | 11   | Ref (A) | 0.29                        | 0.56         |
|                   |               |      | Alt (G) | 0.71                        |              |
| rs7116978         | CYP2R1        | 11   | Ref (T) | 0.26                        | 0.84         |
|                   |               |      | Alt (C) | 0.74                        |              |
| <b>rs10877012</b> | CYP27B1       | 12   | Ref (G) | 0.8                         | <b>0.04*</b> |
|                   |               |      | Alt (T) | 0.2                         |              |
| rs4646536         | CYP27B1       | 12   | Ref (A) | 0.76                        | 0.15         |
|                   |               |      | Alt (G) | 0.24                        |              |
| rs703842          | CYP27B1       | 12   | Ref (A) | 0.73                        | 0.11         |
|                   |               |      | Alt (G) | 0.27                        |              |
| rs11234027        | DHCR7/NADSYN1 | 11   | Ref (G) | 0.7                         | 0.09         |
|                   |               |      | Alt (A) | 0.3                         |              |
| rs12785878        | DHCR7/NADSYN1 | 11   | Ref (G) | 0.72                        | 0.24         |
|                   |               |      | Alt (T) | 0.28                        |              |
| rs3829251         | DNCR7/NADSYN1 | 11   | Ref (G) | 0.69                        | 0.07         |
|                   |               |      | Alt (A) | 0.31                        |              |
| rs1155563         | GC            | 4    | Ref (T) | 0.8                         | 0.36         |
|                   |               |      | Alt (C) | 0.2                         |              |
| rs12512631        | GC            | 4    | Ref (T) | 0.64                        | 0.17         |
|                   |               |      | Alt (C) | 0.36                        |              |
| rs16846876        | GC            | 4    | Ref (A) | 0.76                        | 0.73         |
|                   |               |      | Alt (T) | 0.24                        |              |
| rs17467825        | GC            | 4    | Ref (A) | 0.8                         | 0.75         |
|                   |               |      | Alt (G) | 0.2                         |              |
| rs222020          | GC            | 4    | Ref (C) | 0.2                         | 0.47         |
|                   |               |      | Alt (T) | 0.8                         |              |
| rs2282679         | GC            | 4    | Ref (T) | 0.79                        | 0.2          |
|                   |               |      | Alt (G) | 0.21                        |              |
| rs2298849         | GC            | 4    | Ref (A) | 0.73                        | 0.13         |
|                   |               |      | Alt (G) | 0.27                        |              |
| rs2298850         | GC            | 4    | Ref (G) | 0.22                        | 0.68         |
|                   |               |      | Alt (C) | 0.78                        |              |

|                  |         |    |         |      |              |
|------------------|---------|----|---------|------|--------------|
| <b>rs2882679</b> | GC      | 4  | Ref (C) | 1    | <b>NA</b>    |
|                  |         |    | Alt (T) | 0    |              |
| rs3755967        | GC      | 4  | Ref (C) | 0.79 | 0.19         |
|                  |         |    | Alt (T) | 0.21 |              |
| rs4588           | GC      | 4  | Ref (G) | 0.77 | 0.59         |
|                  |         |    | Alt (T) | 0.23 |              |
| <b>rs7041</b>    | GC      | 4  | Ref (A) | 0.56 | <b>0.05*</b> |
|                  |         |    | Alt (C) | 0.44 |              |
| rs17219315       | CYP24A1 | 20 | Ref (A) | 0.98 | 0.87         |
|                  |         |    | Alt (G) | 0.02 |              |
| rs2244719        | CYP24A1 | 20 | Ref (C) | 0.37 | 0.46         |
|                  |         |    | Alt (T) | 0.63 |              |
| rs229624         | CYP24A1 | 20 | Ref (G) | 0.79 | 0.44         |
|                  |         |    | Alt (A) | 0.21 |              |
| rs2296241        | CYP24A1 | 20 | Ref (G) | 0.43 | 0.11         |
|                  |         |    | Alt (A) | 0.57 |              |
| rs2426496        | CYP24A1 | 20 | Ref (T) | 0.47 | 0.16         |
|                  |         |    | Alt (G) | 0.53 |              |
| rs4809960        | CYP24A1 | 20 | Ref (T) | 0.72 | 0.12         |
|                  |         |    | Alt (C) | 0.28 |              |
| rs6013897        | CYP24A1 | 20 | Ref (T) | 0.7  | 0.78         |
|                  |         |    | Alt (A) | 0.3  |              |

**Supplementary Table S4.** Association of genotypes with D/ND and SD/MD/ND (Chi-square test) and with vitamin D level (ANOVA)

| SNP ID     | Gene   | Chr. | P-value (D/ND) | P-value vitamin D level (ANOVA) |
|------------|--------|------|----------------|---------------------------------|
| rs10783219 | VDR    | 12   | P = 0.8447     | P = 0.9100                      |
| rs7139166  | VDR    | 12   | P = 0.6943     | P = 0.4528                      |
| rs731236   | VDR    | 12   | P = 0.1878     | P = 0.3048                      |
| rs4516035  | VDR    | 12   | P = 0.6943     | P = 0.4528                      |
| rs10741657 | CYP2R1 | 11   | P = 0.5257     | P = 0.3263                      |
| rs10766197 | CYP2R1 | 11   | P = 0.9394     | P = 0.7176                      |
| rs12794714 | CYP2R1 | 11   | P = 0.8940     | P = 0.8546                      |
| rs1562902  | CYP2R1 | 11   | P = 0.5215     | P = 0.8665                      |
| rs10500804 | CYP2R1 | 11   | P = 0.9421     | P = 0.8547                      |
| rs1993116  | CYP2R1 | 11   | P = 0.5257     | P = 0.3263                      |

|            |               |    |            |                   |
|------------|---------------|----|------------|-------------------|
| rs7116978  | CYP2R1        | 11 | P = 0.9656 | P = 0.6342        |
| rs4646536  | CYP27B1       | 12 | P = 0.6064 | P = 0.6646        |
| rs703842   | CYP27B1       | 12 | P = 0.8409 | P = 0.6667        |
| rs11234027 | DHCR7/NADSYN1 | 11 | P = 0.7029 | P = 0.8015        |
| rs12785878 | DHCR7/NADSYN1 | 11 | P = 0.3467 | P = 0.3792        |
| rs3829251  | DNCR7/NADSYN1 | 11 | P = 0.5888 | P = 0.3886        |
| rs1155563  | GC            | 4  | P = 0.3683 | P = 0.9884        |
| rs12512631 | GC            | 4  | P = 0.0640 | <b>P = 0.0356</b> |
| rs16846876 | GC            | 4  | P = 0.7397 | P = 0.6667        |
| rs17467825 | GC            | 4  | P = 0.6168 | P = 0.9698        |
| rs222020   | GC            | 4  | P = 0.7799 | P = 0.5162        |
| rs2282679  | GC            | 4  | P = 0.7923 | P = 0.9590        |
| rs2298849  | GC            | 4  | P = 0.9687 | P = 0.4493        |
| rs2298850  | GC            | 4  | P = 0.5779 | P = 0.9850        |
| rs3755967  | GC            | 4  | P = 0.8157 | P = 0.9620        |
| rs4588     | GC            | 4  | P = 0.5256 | P = 0.9767        |
| rs17219315 | CYP24A1       | 20 | P = 0.5922 | P = 0.7702        |
| rs2244719  | CYP24A1       | 20 | P = 0.4368 | P = 0.9075        |
| rs229624   | CYP24A1       | 20 | P = 0.5013 | P = 0.3740        |
| rs2296241  | CYP24A1       | 20 | P = 0.4216 | P = 0.7995        |
| rs2426496  | CYP24A1       | 20 | P = 0.5693 | P = 0.7863        |

|           |         |    |            |            |
|-----------|---------|----|------------|------------|
| rs4809960 | CYP24A1 | 20 | P = 0.7945 | P = 0.9076 |
| rs6013897 | CYP24A1 | 20 | P = 0.0732 | P = 2460   |

**Supplementary Table S5.** Association of variants of different SNPs selected in the study with overall all microbial abundance using Kruskal-Wallis followed by post hoc Dunn's test (with p-adjusted with Bonferroni).

| SNP ID     | SNP-variant1 | SNP-variant2 | p.adj      | p.adj.signif |
|------------|--------------|--------------|------------|--------------|
| rs12785878 | GG           | GT           | 0.0000891  | ****         |
|            | GG           | TT           | 0.447      | ns           |
|            | GT           | TT           | 0.00909    | **           |
| rs2244719  | CC           | CT           | 4.38E-08   | ****         |
|            | CC           | TT           | 2.01E-16   | ****         |
|            | CT           | TT           | 6.68E-04   | ***          |
| rs3755967  | AA           | AG           | 7.15E-06   | ****         |
|            | AA           | GG           | 1.64E-10   | ****         |
|            | AG           | GG           | 1.07E-05   | ****         |
| rs7041     | GG           | GT           | 6.03E-08   | ****         |
|            | GG           | TT           | 7.92E-03   | **           |
|            | GT           | TT           | 3.64E-16   | ****         |
| rs10500804 | GG           | GT           | 0.000732   | ***          |
|            | GG           | TT           | 0.112      | ns           |
|            | GT           | TT           | 0.221      | ns           |
| rs10741657 | AA           | AG           | 6.92E-14   | ****         |
|            | AA           | GG           | 7.59E-06   | ****         |
|            | AG           | GG           | 4.95E-11   | ****         |
| rs12794714 | AA           | AG           | 0.000732   | ***          |
|            | AA           | GG           | 0.112      | ns           |
|            | AG           | GG           | 0.221      | ns           |
| rs2282679  | AA           | AC           | 1.07E-05   | ****         |
|            | AA           | CC           | 1.64E-10   | ****         |
|            | AC           | CC           | 7.15E-06   | ****         |
| rs3829251  | AA           | AG           | 0.00094    | ***          |
|            | AA           | GG           | 0.000609   | ***          |
|            | AG           | GG           | 1          | ns           |
| rs7116978  | CC           | CT           | 0.00000013 | ****         |
|            | CC           | TT           | 1          | ns           |



|            |    |    |            |      |
|------------|----|----|------------|------|
|            | CT | TT | 0.239      | ns   |
| rs10766197 | AA | AG | 0.00000236 | **** |
|            | AA | GG | 0.0143     | *    |
|            | AG | GG | 0.0621     | ns   |
| rs1562902  | CC | CT | 0.0199     | *    |
|            | CC | TT | 0.00296    | **   |
|            | CT | TT | 1          | ns   |
| rs229624   | CC | CT | 1.69E-08   | **** |
|            | CC | TT | 1.24E-27   | **** |
|            | CT | TT | 4.34E-20   | **** |
| rs4516035  | CC | CT | 0.0444     | *    |
|            | CC | TT | 0.0225     | *    |
|            | CT | TT | 1          | ns   |
| rs7139166  | CC | CG | 1          | ns   |
|            | CC | GG | 0.0225     | *    |
|            | CG | GG | 0.0444     | *    |
| rs10783219 | AA | AT | 1.00E+00   | ns   |
|            | AA | TT | 2.93E-42   | **** |
|            | AT | TT | 1.29E-46   | **** |
| rs16846876 | AA | AT | 1          | ns   |
|            | AA | TT | 0.602      | ns   |
|            | AT | TT | 1          | ns   |
| rs2296241  | AA | AG | 0.000175   | ***  |
|            | AA | GG | 0.000179   | ***  |
|            | AG | GG | 1          | ns   |
| rs4588     | AA | AC | 1.57E-04   | ***  |
|            | AA | CC | 1.00E+00   | ns   |
|            | AC | CC | 1.32E-11   | **** |
| rs731236   | CC | CT | 3.13E-04   | ***  |
|            | CC | TT | 6.15E-03   | **   |
|            | CT | TT | 1.15E-16   | **** |
| rs10877012 | GG | GT | 4.97E-41   | **** |
|            | GG | TT | 2.79E-01   | ns   |
|            | GT | TT | 8.16E-12   | **** |
| rs17219315 | AA | AG | 0.00000128 | **** |

|            |    |    |           |      |
|------------|----|----|-----------|------|
| rs2298849  | CC | CT | 7.29E-15  | **** |
|            | CC | TT | 6.19E-16  | **** |
|            | CT | TT | 6.49E-01  | ns   |
| rs4646536  | CC | CT | 2.99E-05  | **** |
|            | CC | TT | 9.15E-04  | ***  |
|            | CT | TT | 1.69E-31  | **** |
| rs11234027 | AA | AG | 0.000701  | ***  |
|            | AA | GG | 0.000878  | ***  |
|            | AG | GG | 1         | ns   |
| rs17467825 | AA | AG | 1.32E-11  | **** |
|            | AA | GG | 1.00E+00  | ns   |
|            | AG | GG | 1.57E-04  | ***  |
| rs2298850  | CC | CG | 1.32E-11  | **** |
|            | CC | GG | 1.00E+00  | ns   |
|            | CG | GG | 1.57E-04  | ***  |
| rs4809960  | CC | CT | 4.81E-11  | **** |
|            | CC | TT | 7.75E-13  | **** |
|            | CT | TT | 1.00E+00  | ns   |
| rs1155563  | CC | CT | 0.0000176 | **** |
|            | CC | TT | 0.00013   | ***  |
|            | CT | TT | 0.697     | ns   |
| rs1993116  | CC | CT | 4.95E-11  | **** |
|            | CC | TT | 7.59E-06  | **** |
|            | CT | TT | 6.92E-14  | **** |
| rs2426496  | GG | GT | 2.95E-16  | **** |
|            | GG | TT | 1.00E+00  | ns   |
|            | GT | TT | 3.24E-12  | **** |
| rs6013897  | AA | AT | 5.45E-07  | **** |
|            | AA | TT | 2.83E-01  | ns   |
|            | AT | TT | 2.14E-29  | **** |
| rs12512631 | CC | CT | 0.00197   | **   |
|            | CC | TT | 0.00192   | **   |
|            | CT | TT | 1         | ns   |
| rs222020   | CC | CT | 9.66E-09  | **** |
|            | CC | TT | 1.33E-15  | **** |
|            | CT | TT | 8.87E-08  | **** |
| rs703842   | CC | CT | 2.13E-08  | **** |
|            | CC | TT | 6.98E-06  | **** |
|            | CT | TT | 9.79E-49  | **** |

**Supplementary Table S6.** Ethnicities of the non-Arab participants in the study.

| Non-Arab Ethnicities | Numbers |
|----------------------|---------|
| African              | 1       |
| Asian                | 19      |
| European             | 2       |
| South American       | 2       |
| American Caucasian   | 2       |

**Supplementary Table S7.** Predictor variables of serum 25-hydroxy vitamin D levels and their coefficient.

| Variable                                  | Regression_Coefficient |
|-------------------------------------------|------------------------|
| Intercept                                 | 40.67442513            |
| Age                                       | -0.086363106           |
| BMI_Z_SCORE                               | -1.202321923           |
| B_F_ratio                                 | -1.211954089           |
| Observed_Species                          | 0.038494135            |
| GenderMale                                | -4.353997941           |
| EthnicityNon.Arab                         | 0.849253737            |
| Daily_sun_exposureLess.than.1.2.hr        | -5.81567709            |
| Daily_sun_exposureMore.than.1.hr          | 2.161607352            |
| Physical_activityYes.indoor               | 5.985652302            |
| Physical_activityYes.outdoor              | 1.692443418            |
| Dairy_product_consumptionYes              | 10.12865704            |
| rs12512631C.T                             | -4.709728655           |
| rs12512631T.T                             | 0.468052562            |
| Family_history_of_vitamin_D_deficiencyYes | -0.466009597           |
| Consumption_of_fishMonthly                | -2.240606426           |
| Consumption_of_fishNone                   | -5.205640325           |
| Consumption_of_fishWeekly                 | 0                      |

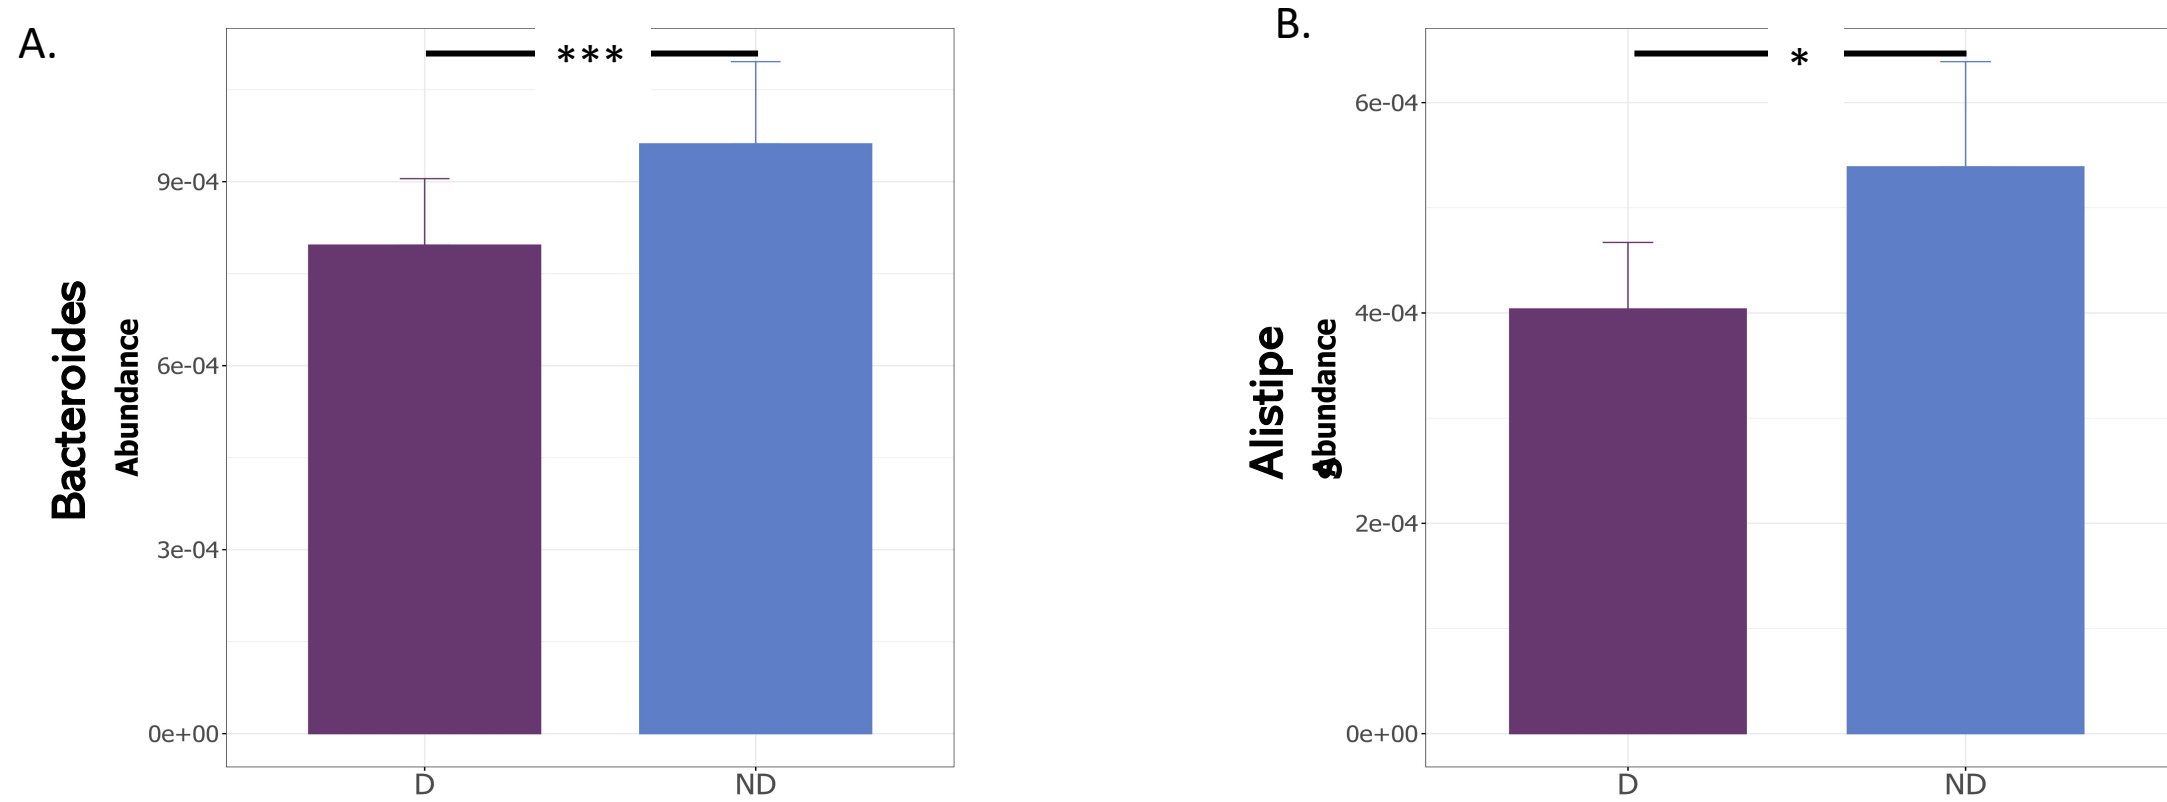

## Supplimentary Figure S1

(**A**) Abundance of genus *Bacteroides* (**B**) genus *Alistipes* in Vitamin D deficient(D) and non-deficient groups(ND) groups. (Wilcoxon test with false discovery rate (FDR)-Bonferroni corrected  $*P < 0.05$  and  $***P < 0.001$ ). The figure was generated using (RStudio v 1.4 with R v 4.1).

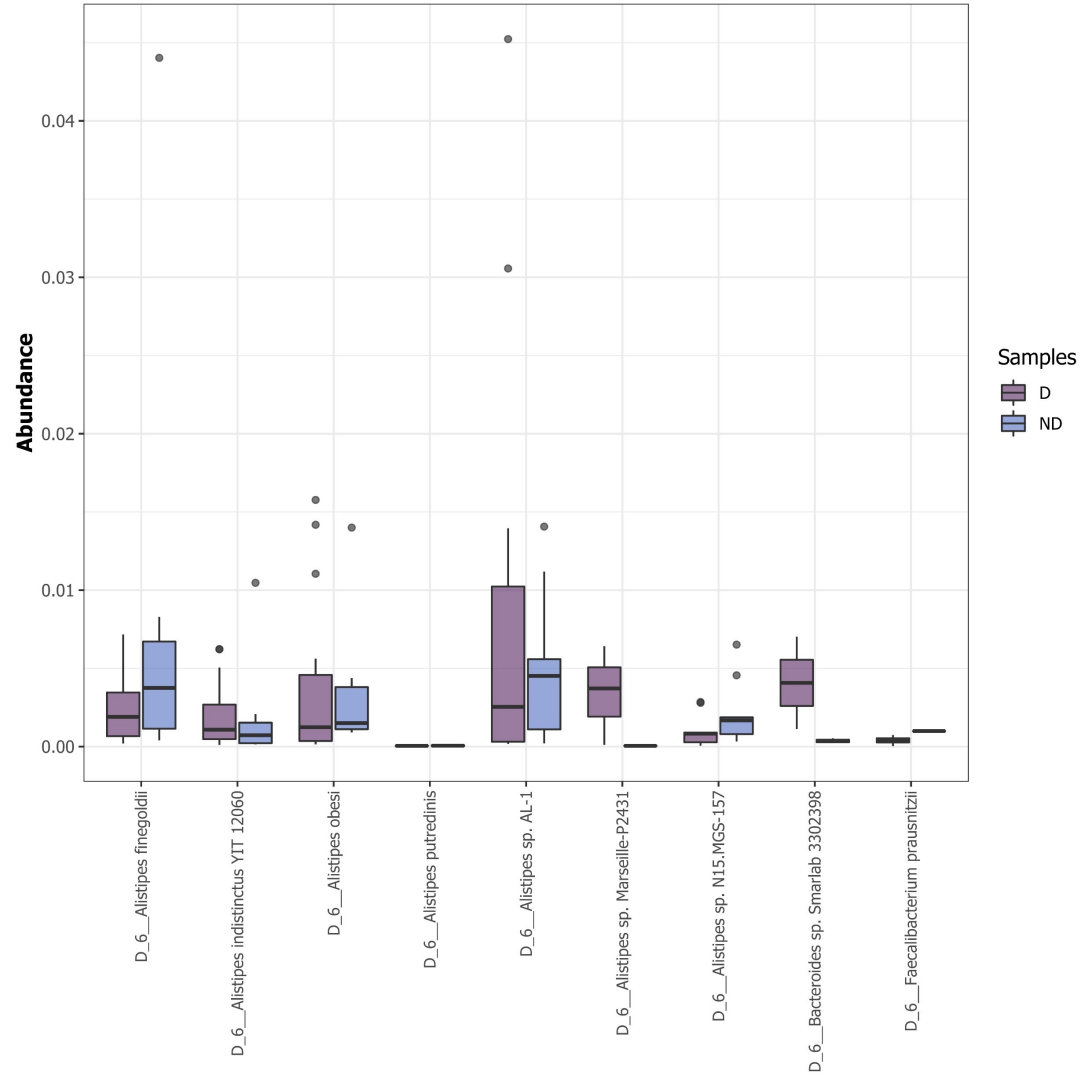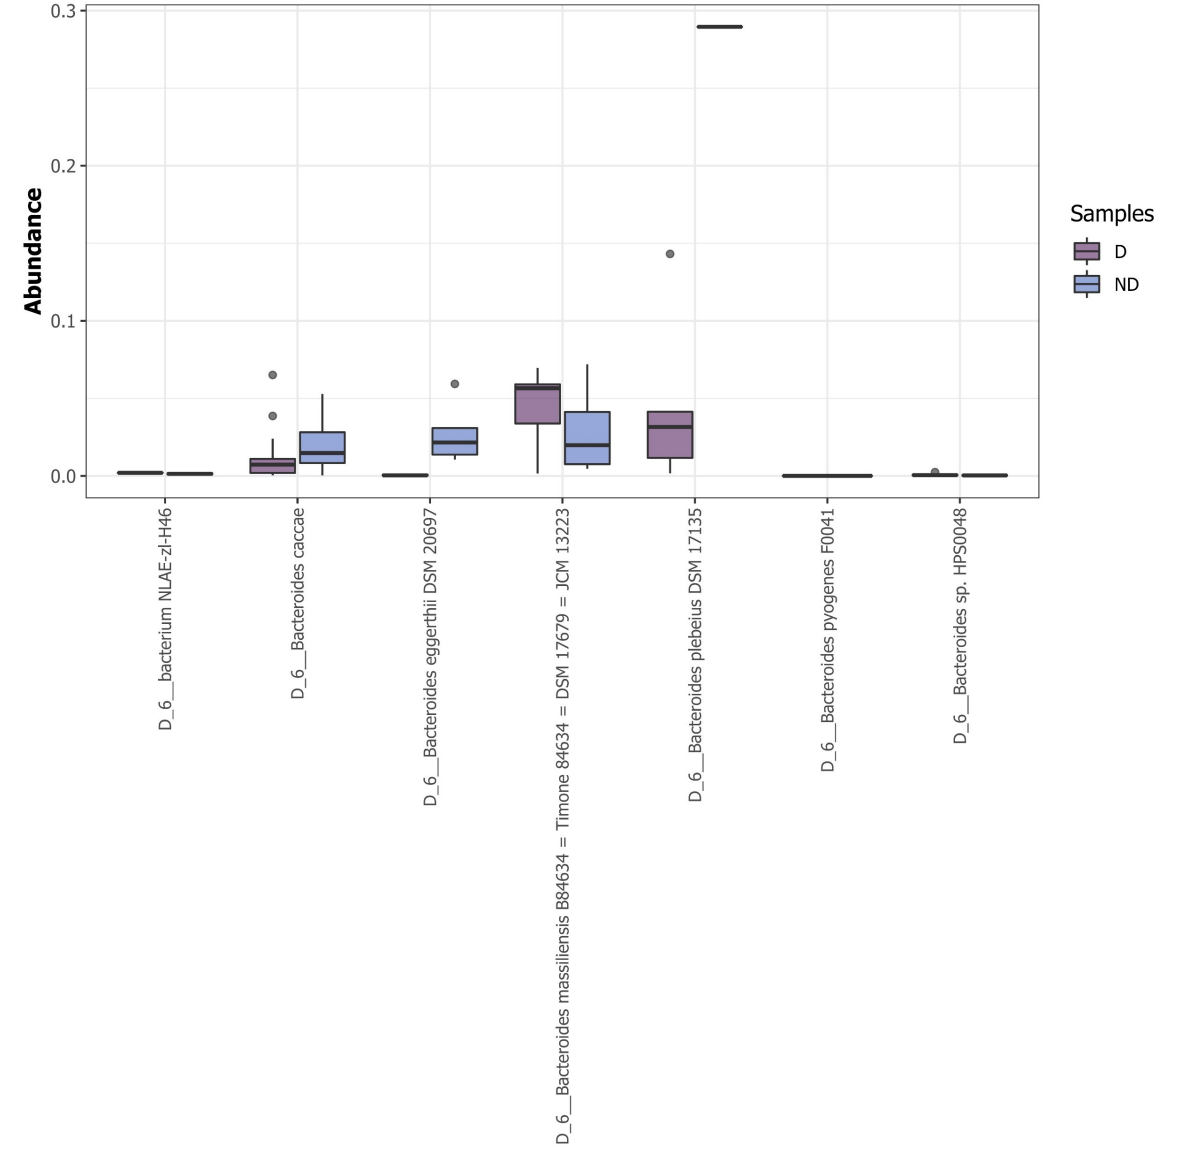

## Supplementary Figure S2

Differences in Abundance of top 20 species between the Vitamin D deficient(D) and non-deficient groups(ND) groups.

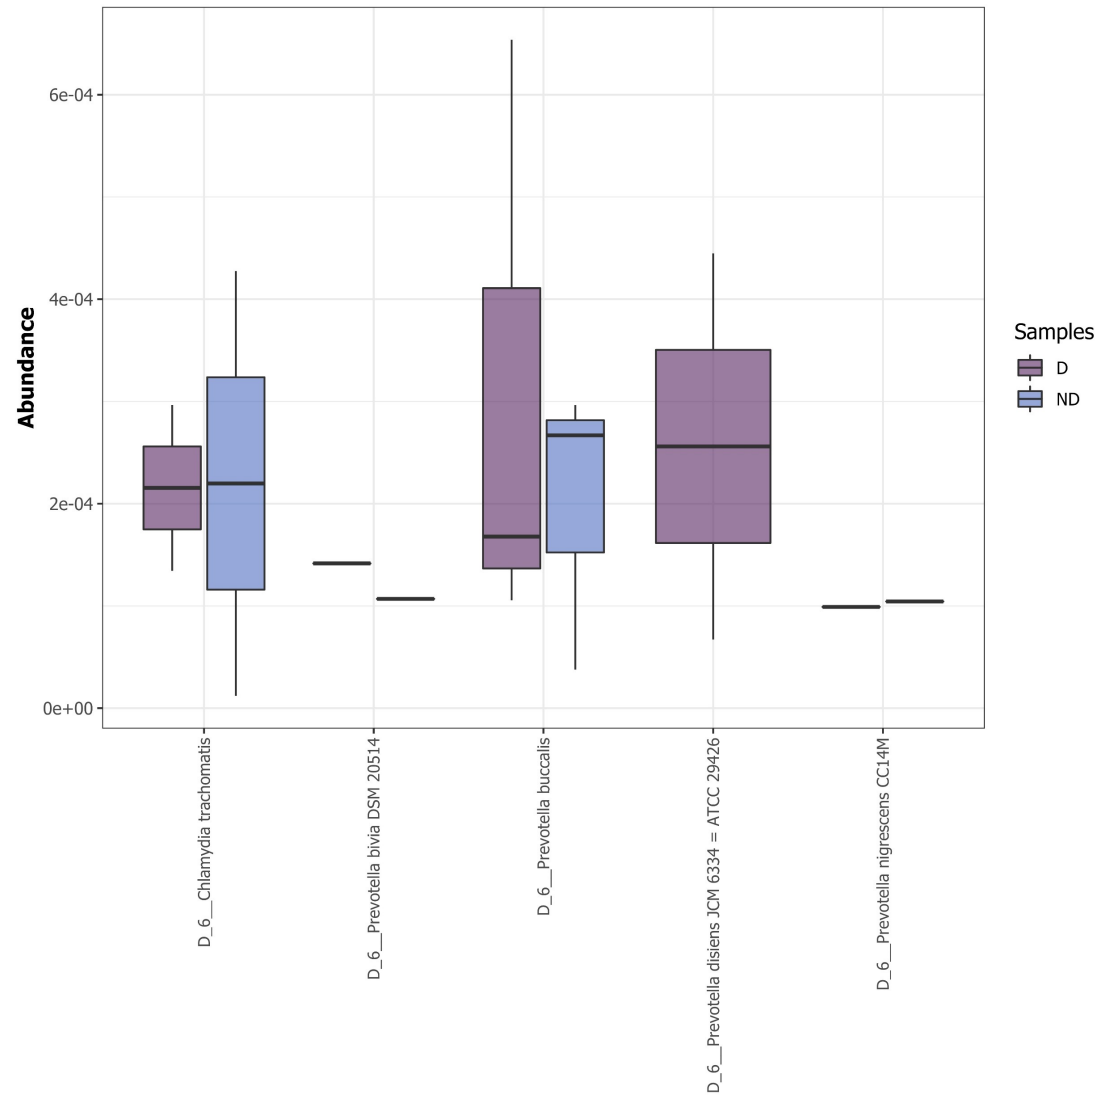

## Supplmentary Figure S3

Differences in Abundance of top 20 species between the Vitamin D deficient(D) and non-deficient groups(ND) groups.

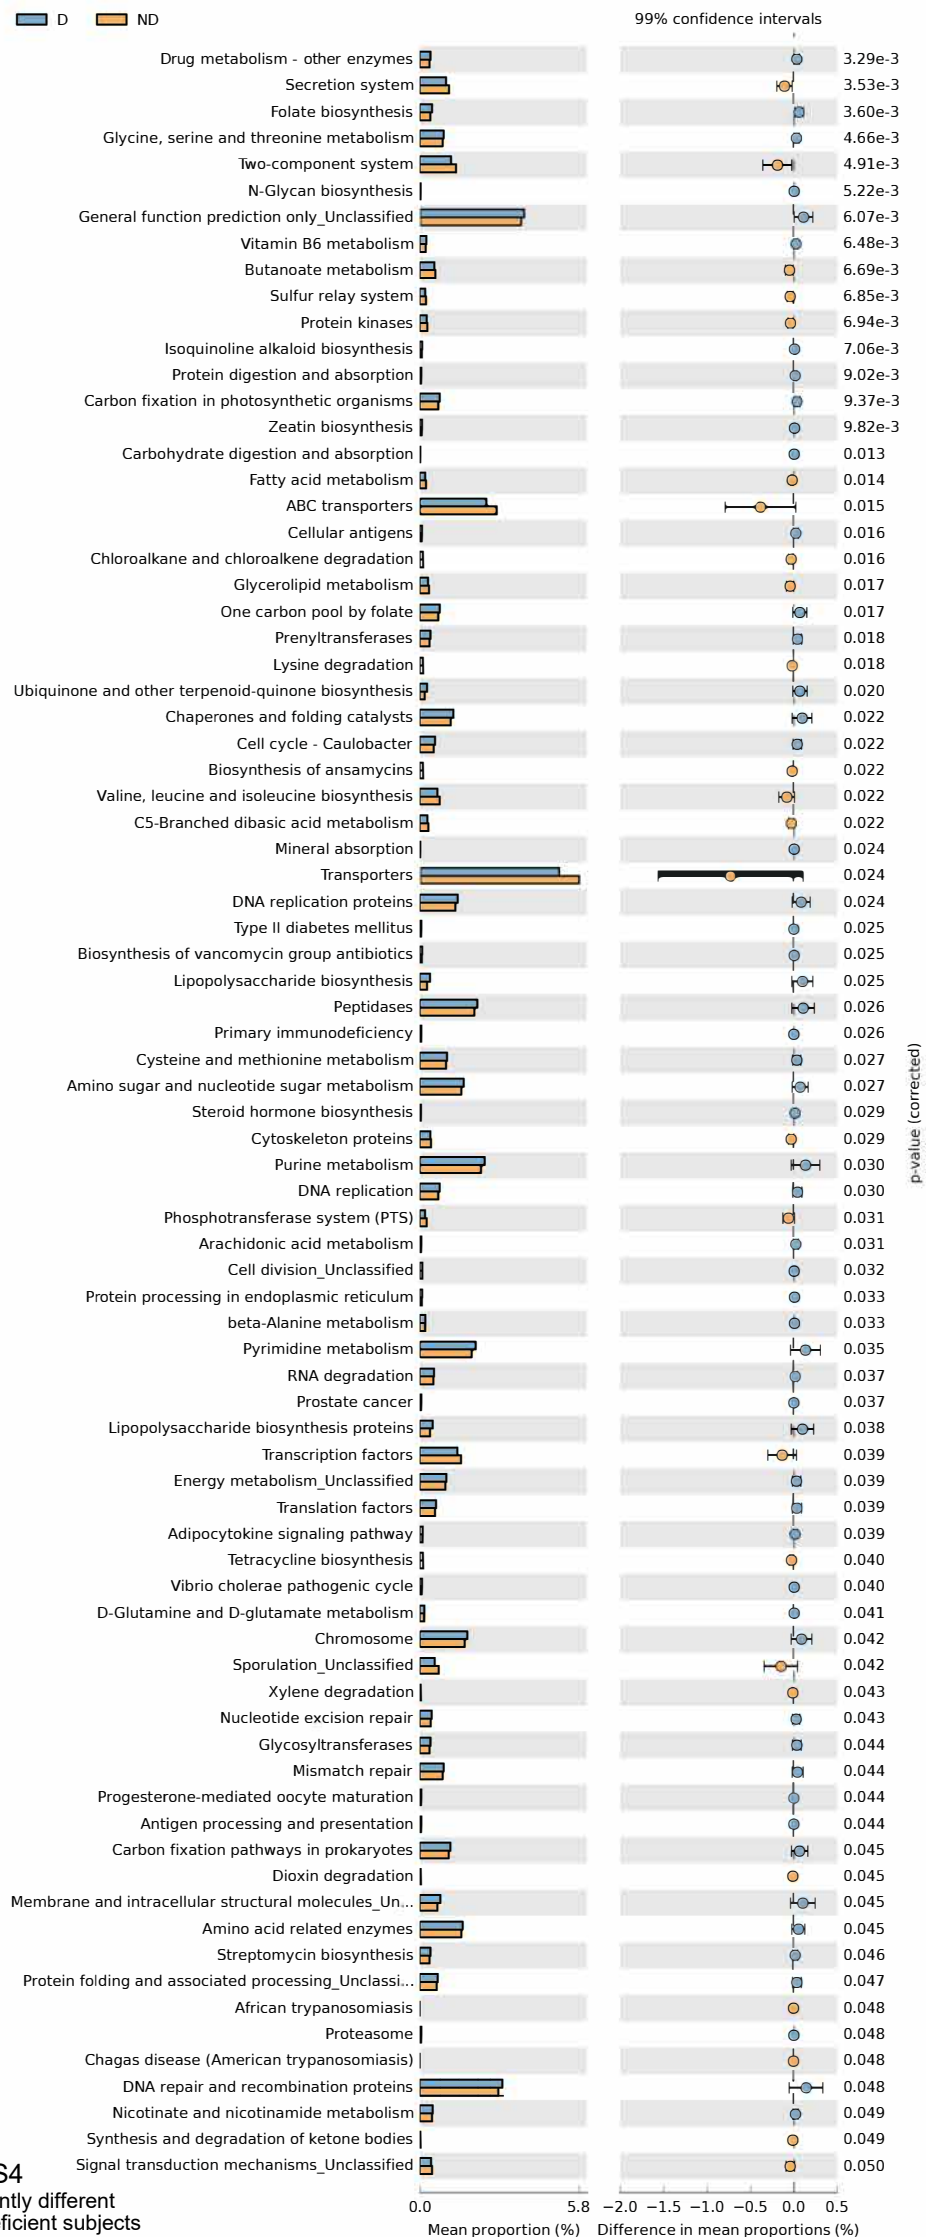

Supplementary Figure S4  
Functional pathways significantly different  
between deficient and non-deficient subjects

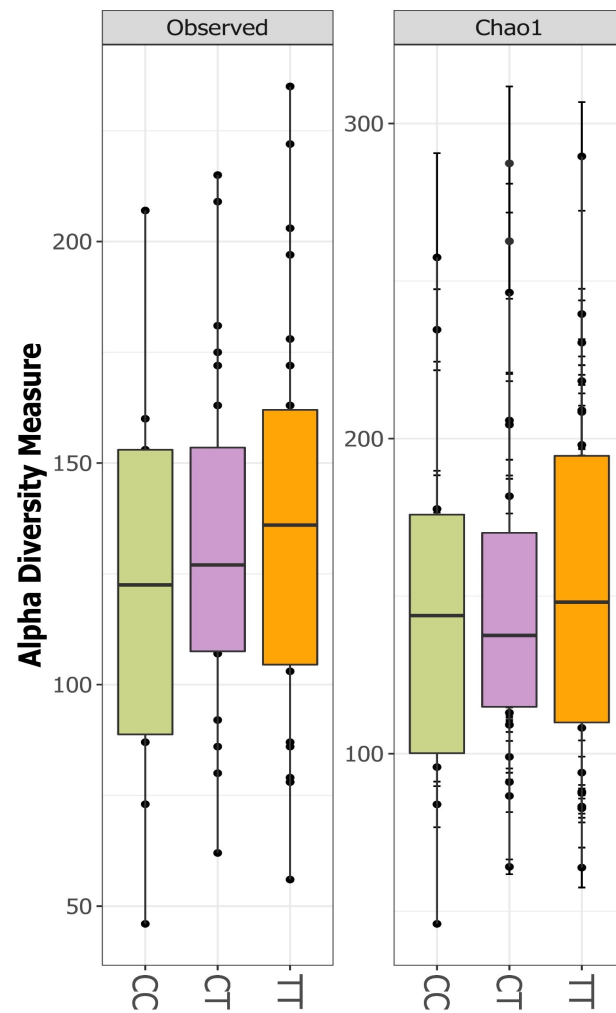

## Supplmentary Figure S5

Correlation of alpha diversity measures and the three genotypes of SNP of interest rs12512631 .



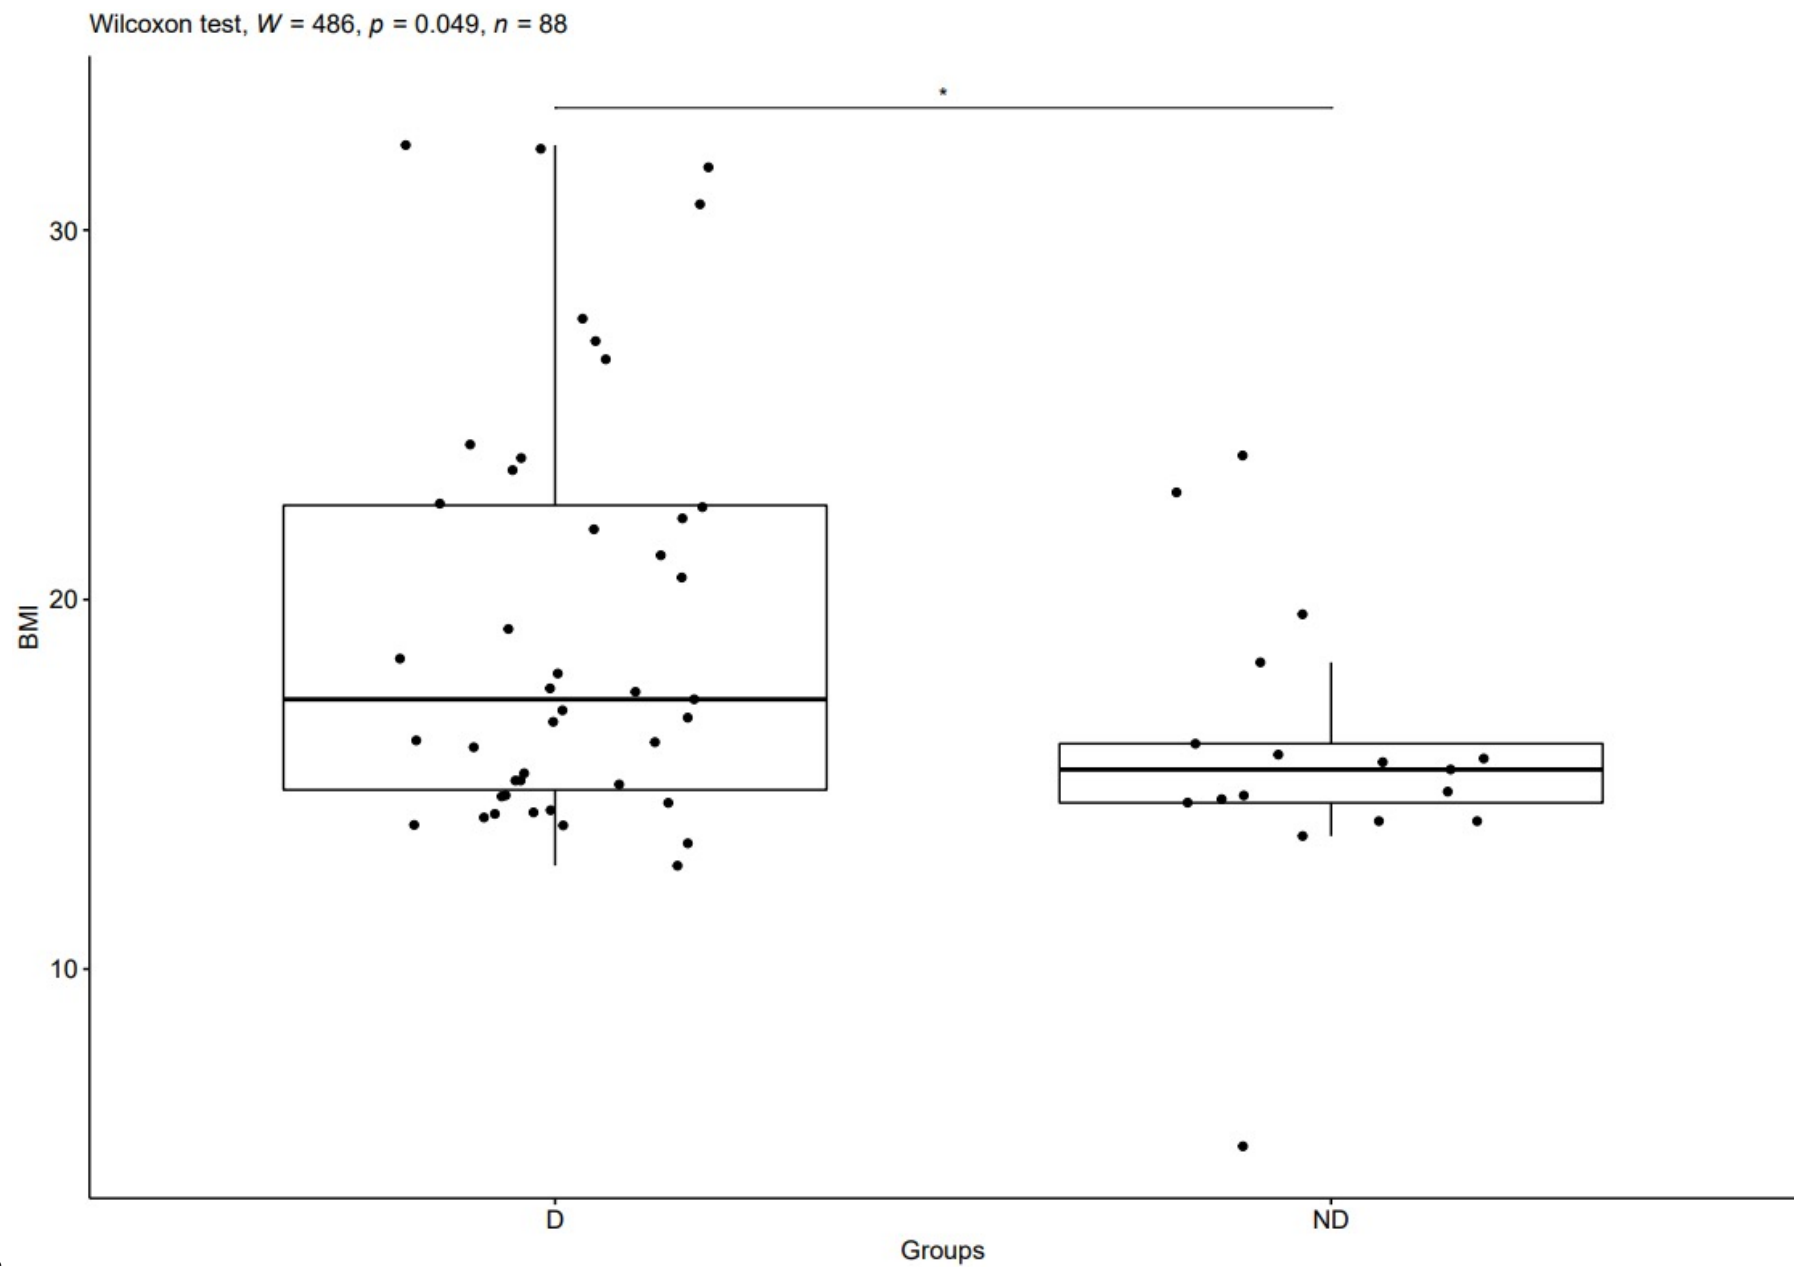

Supplementary Figure S6  
Significant differences in the BMI of Deficient and non-deficient kids.
